# Supplementary material for: Methods of Radiographic Measurements of Heart and Left Atrial Size in Dogs with and without Myxomatous Mitral Valve Disease: Intra- and Interobserver Agreement and Practicability of Different Methods
Source: MDPI journal article supplement (doi:10.3390/ani12192531), 2022-09-22
Supplement: s1 [file s1]

**Additional Table c.** Radiographic measurements among the different observers in inverted radiographs

|                     |               | CG          | Stage B1   | Stage B2     | Stage C       |
|---------------------|---------------|-------------|------------|--------------|---------------|
| VHS                 | All Observers | 10.7 ± 0.8* | 10.5 ± 0.6 | 11.3 ± 0.8** | 12.2 ± 1.1*** |
|                     | OB1           | 10.7 ± 0.9* | 10.4 ± 0.6 | 11.3 ± 0.9** | 12.1 ± 1.1*** |
|                     | OB2           | 10.9 ± 0.8  | 10.6 ± 0.6 | 11.4 ± 0.7** | 12.3 ± 1.0*** |
|                     | OB3           | 10.7 ± 0.8* | 10.4 ± 0.5 | 11.3 ± 0.8** | 12.1 ± 1.1*** |
| RLAD                | All Observers | 1.8 ± 0.3*  | 1.8 ± 0.3  | 2.1 ± 0.4**  | 2.6 ± 0.5***  |
|                     | OB1           | 1.7 ± 0.3*  | 1.8 ± 0.3  | 2.1 ± 0.4**  | 2.6 ± 0.5***  |
|                     | OB2           | 1.9 ± 0.3   | 1.8 ± 0.3  | 2.1 ± 0.5**  | 2.6 ± 0.5***  |
|                     | OB3           | 1.6 ± 0.3*  | 1.6 ± 0.3  | 2.1 ± 0.5**  | 2.7 ± 0.5***  |
| LA <sub>Width</sub> | All Observers | 1.7 ± 0.3*  | 1.7 ± 0.3  | 2.0 ± 0.4**  | 2.2 ± 0.4***  |
|                     | OB1           | 1.6 ± 0.3*  | 1.7 ± 0.3  | 1.9 ± 0.3**  | 2.2 ± 0.3***  |
|                     | OB2           | 1.7 ± 0.3*  | 1.6 ± 0.3  | 1.9 ± 0.4**  | 2.2 ± 0.4***  |
|                     | OB3           | 1.7 ± 0.3*  | 1.6 ± 0.3  | 2.0 ± 0.3**  | 2.3 ± 0.4***  |
| VLAS                | All Observers | 2.1 ± 0.3*  | 2.1 ± 0.3  | 2.5 ± 0.4**  | 3.0 ± 0.5***  |
|                     | OB1           | 2.1 ± 0.3*  | 2.2 ± 0.3  | 2.5 ± 0.4**  | 2.9 ± 0.4***  |
|                     | OB2           | 2.2 ± 0.4*  | 2.1 ± 0.3  | 2.5 ± 0.5**  | 3.0 ± 0.5***  |
|                     | OB3           | 2.0 ± 0.3*  | 2.1 ± 0.3  | 2.5 ± 0.4**  | 3.0 ± 0.4***  |

Radiographic measurements presented as mean ± SD of vertebral units. Staging according to the latest consensus statement of the American College of Veterinary Internal Medicine (ACVIM). Each veterinarian performed the measurements in 50 radiographs per group. The combined measurements of all observers contained 150 measurements.

\*: significantly different compared to stage B2 and C (p < 0.002).

\*\*: significantly different compared to stage B1 (p < 0.03).

\*\*\*: significantly different compared to stage B1 and B2 (p < 0.02).

CG: Control group; LA<sub>Width</sub>: Left Atrial Width; OB1: recently graduated veterinarian; OB2: experienced veterinarian; OB3: specialized veterinarian; RLAD: Radiographic Left Atrial Dimension; VHS: Vertebral Heart Size; VLAS: Vertebral Atrial Size.

**Additional Table d.** Grading of each radiographic measurement in inverted radiographs

| Grades for<br>radiographic<br>measurement |   | Control group |     |     | Stage B1 |     |     | Stage B2 |     |     | Stage C |     |     |
|-------------------------------------------|---|---------------|-----|-----|----------|-----|-----|----------|-----|-----|---------|-----|-----|
|                                           |   | OB1           | OB2 | OB3 | OB1      | OB2 | OB3 | OB1      | OB2 | OB3 | OB1     | OB2 | OB3 |
| VHS                                       | 1 | 12            | 13  | 27  | 22       | 18  | 27  | 13       | 18  | 31  | 12      | 10  | 27  |
|                                           | 2 | 19            | 17  | 13  | 13       | 18  | 13  | 25       | 14  | 7   | 24      | 20  | 11  |
|                                           | 3 | 8             | -   | 4   | 3        | 2   | 3   | 2        | 3   | 3   | 6       | 1   | 1   |
|                                           | 4 | 3             | 1   | 2   | 6        | -   | 5   | 7        | 1   | 5   | 2       | -   | 2   |
|                                           | 5 | 8             | 19  | 4   | 6        | 12  | 2   | 3        | 14  | 4   | 6       | 19  | 9   |
| RLAD                                      | 1 | 2             | 2   | 2   | 3        | 3   | 4   | 6        | 3   | 2   | -       | 1   | 10  |
|                                           | 2 | 6             | 3   | 6   | 10       | 10  | 3   | 13       | 6   | 13  | 21      | 9   | 9   |
|                                           | 3 | 10            | -   | 1   | 11       | 4   | 4   | 9        | 4   | 1   | 13      | 4   | 2   |
|                                           | 4 | 4             | 6   | 17  | 7        | 7   | 20  | 4        | 6   | 14  | 5       | 1   | 12  |
|                                           | 5 | 28            | 39  | 24  | 19       | 26  | 19  | 18       | 31  | 20  | 11      | 35  | 17  |
| LA <sub>Width</sub>                       | 1 | 8             | 10  | 20  | 13       | 15  | 26  | 12       | 11  | 29  | 8       | 7   | 29  |
|                                           | 2 | 16            | 10  | 19  | 21       | 11  | 10  | 21       | 18  | 6   | 28      | 19  | 4   |
|                                           | 3 | 8             | 2   | -   | 4        | 8   | 2   | 6        | 3   | 1   | 4       | 3   | 2   |
|                                           | 4 | 7             | 2   | 6   | 6        | 2   | 8   | 8        | 2   | 7   | 3       | -   | 4   |
|                                           | 5 | 11            | 26  | 5   | 6        | 14  | 4   | 3        | 16  | 7   | 7       | 21  | 11  |
| VLAS                                      | 1 | 20            | 13  | 26  | 25       | 19  | 27  | 29       | 18  | 30  | 30      | 18  | 32  |
|                                           | 2 | 11            | 20  | 13  | 14       | 20  | 11  | 11       | 22  | 6   | 10      | 15  | 3   |
|                                           | 3 | 2             | -   | -   | 1        | 1   | 1   | -        | -   | -   | 1       | -   | 1   |
|                                           | 4 | 13            | 7   | 7   | 9        | 2   | 7   | 9        | 2   | 9   | 8       | 8   | 6   |
|                                           | 5 | 4             | 10  | 4   | 1        | 8   | 4   | 1        | 8   | 5   | 1       | 9   | 8   |

Summarized observers' confidence for the radiographic measurements. Three veterinarians with different levels of experience (recently graduated veterinarian, experienced veterinarian, and specialized veterinarian) performed the grading. Grades represented the difficulty in recognizing the anatomical landmarks and defining the radiographic measurements. Staging according to latest consensus statement of the American College of Veterinary Internal Medicine (ACVIM).

LA<sub>Width</sub>: Left Atrial Width; OB1: recently graduated veterinarian; OB2: experienced veterinarian; OB3: specialized veterinarian; RLAD: Radiographic Left Atrial Dimension; VHS: Vertebral Heart Size; VLAS: Vertebral Atrial Size.

**Additional Table 3.** Distribution of inverted well-identifiable radiographs and radiographs with measurement difficulties in the different groups

| Evaluation criteria               | all groups<br>n=600 (%) | CG<br>n=150 (%) | Stage B1<br>n=150 (%) | Stage B2<br>n=150 (%) | Stage C<br>n=150 (%) |
|-----------------------------------|-------------------------|-----------------|-----------------------|-----------------------|----------------------|
| Well-identifiable radiographs     |                         |                 |                       |                       |                      |
| VHS                               | 232 (38.7)              | 52 (34.7)       | 67 (44.7)             | 64 (42.7)             | 49 (32.7)            |
| RLAD                              | 38 (6.3)                | 6 (4)           | 10 (6.6)              | 11 (7.3)              | 11 (7.3)             |
| LA <sub>Width</sub>               | 190 (31.7)              | 39 (26)         | 54 (36)               | 53 (35.3)             | 44 (29.3)            |
| VLAS                              | 287 (47.8)              | 59 (39.3)       | 71 (47.3)             | 77 (51.3)             | 80 (53.3)            |
| anatomical landmarks              |                         |                 |                       |                       |                      |
| carina tracheae*, **, †, ‡        | 145 (24.2)              | 49 (32.7)       | 33 (22)               | 31 (20.7)             | 32 (21.3)            |
| dorsal margin left atrium**       | 489 (81.5)              | 134 (89.3)      | 126 (84)              | 124 (82.7)            | 105 (70)             |
| dorsal vena cava caudalis**, †, ‡ | 240 (40)                | 63 (42)         | 62 (41.3)             | 56 (37.3)             | 59 (39.3)            |
| ventral vena cava caudalis*       | 116 (19.3)              | 29 (19.3)       | 30 (20)               | 23 (15.3)             | 34 (22.7)            |
| apex cordis*, **, †               | 256 (42.7)              | 68 (45.3)       | 45 (30)               | 60 (40)               | 83 (55.3)            |
| cranial heart side*               | 41 (6.8)                | 5 (3.3)         | 10 (6.6)              | 10 (6.6)              | 16 (10.7)            |

600 radiographic evaluations (50 per group and 200 per observer) were performed by three different veterinarians with different levels of experience (recently graduated veterinarian, experienced veterinarian, and specialized veterinarian); multiple selection possible. Observers rated the same radiographs. Staging according to the latest consensus statement of the American College of Veterinary Internal Medicine (ACVIM).

\*: part of VHS measurement.

\*\* : part of RLAD measurement.

†: part of LA<sub>Width</sub> measurement.

‡: part of VLAS measurement.

CG: Control group; LA<sub>Width</sub>: Left Atrial Width; RLAD: Radiographic Left Atrial Dimension;

VHS: Vertebral Heart Size; VLAS: Vertebral Atrial Size.

**Additional Table f.** Distribution of inverted well-identifiable radiographs and radiographs with measurement difficulties measured by the individual observers

| Evaluation criteria               | CG  |     |     | Stage B1 |     |     | Stage B2 |     |     | Stage C |     |     |
|-----------------------------------|-----|-----|-----|----------|-----|-----|----------|-----|-----|---------|-----|-----|
|                                   | OB1 | OB2 | OB3 | OB1      | OB2 | OB3 | OB1      | OB2 | OB3 | OB1     | OB2 | OB3 |
| Well-identifiable radiographs     |     |     |     |          |     |     |          |     |     |         |     |     |
| VHS                               | 12  | 13  | 27  | 22       | 18  | 27  | 15       | 18  | 31  | 12      | 10  | 27  |
| RLAD                              | 2   | 2   | 2   | 3        | 3   | 4   | 6        | 3   | 2   | 0       | 1   | 10  |
| LA <sub>Width</sub>               | 8   | 10  | 21  | 13       | 15  | 26  | 12       | 12  | 29  | 8       | 7   | 29  |
| VLAS                              | 20  | 14  | 25  | 25       | 19  | 27  | 29       | 18  | 30  | 30      | 18  | 32  |
| anatomical landmarks              |     |     |     |          |     |     |          |     |     |         |     |     |
| carina tracheae*, **, †, ‡        | 15  | 18  | 16  | 5        | 14  | 14  | 8        | 13  | 10  | 7       | 14  | 11  |
| dorsal margin of left atrium**    | 44  | 45  | 45  | 40       | 41  | 45  | 32       | 44  | 48  | 28      | 40  | 37  |
| dorsal vena cava caudalis**, †, ‡ | 21  | 28  | 14  | 22       | 26  | 14  | 14       | 27  | 15  | 15      | 28  | 16  |
| ventral vena cava caudalis*       | 12  | 12  | 5   | 11       | 12  | 7   | 7        | 7   | 9   | 8       | 15  | 11  |
| apex cordis*, **, †               | 29  | 29  | 10  | 20       | 21  | 4   | 26       | 25  | 9   | 35      | 33  | 15  |
| cranial heart side*               | 1   | 3   | 1   | 1        | 4   | 5   | 0        | 8   | 2   | 2       | 9   | 5   |

600 radiographic evaluations (50 per group and 200 per observer) were performed by three different veterinarians with different levels of experience (OB 1, OB 2, and OB 3); multiple selection possible. Observers rated the same radiographs. Staging according to the latest consensus statement of the American College of Veterinary Internal Medicine (ACVIM).

\*: part of VHS measurement.

\*\* : part of RLAD measurement.

†: part of LA<sub>Width</sub> measurement.

‡: part of VLAS measurement.

---

CG: Control group; LA<sub>Width</sub>: Left Atrial Width; OB1: recently graduated veterinarian; OB2: experienced veterinarian; OB3: specialized veterinarian; RLAD: Radiographic Left Atrial Dimension; VHS: Vertebral Heart Size; VLAS: Vertebral Atrial Size.
