# Supplementary material for: Methods of Radiographic Measurements of Heart and Left Atrial Size in Dogs with and without Myxomatous Mitral Valve Disease: Intra- and Interobserver Agreement and Practicability of Different Methods
Source: MDPI journal article supplement (doi:10.3390/ani12192531), 2022-09-22
Supplement: s1 [file s1]

**Additional Table b.** Radiographic settings

| Weight (kg)              | 0-2  | 3-5  | 6-10 | 11-15 | 16-20 | 21-30 | 31-40 | 41-50 | 51-60 | 61-70 | >71   |
|--------------------------|------|------|------|-------|-------|-------|-------|-------|-------|-------|-------|
| lateral<br>thoracic view | 52/8 | 55/8 | 60/8 | 60/8  | 70/8  | 70/8  | 73/8  | 73/8  | 73/8  | 77/8  | 81/10 |

Tube voltage and miliampereseconds are indicated (kV/mAs).
